# Supplementary material for: 2D layered BP/InSe and BP/Janus In2SeX (X = S or Te) type-II van der Waals heterostructures for photovoltaics: insight from first-principles calculations
Source: Royal Society of Chemistry journal article supplement (doi:10.1039/d3cp01290e), 2023-01-01
Supplement: d3cp01290e1.pdf [file d3cp01290e1.pdf]

*Electronic supplementary information for*

**2D layered BP/InSe and BP/Janus In<sub>2</sub>SeX (X=S or Te) type-II van der Waals heterostructures  
for photovoltaics: insight from first-principles calculations**

Kai Cheng,<sup>a,\*</sup> Jinke Xu,<sup>a</sup> Xu Guo,<sup>a</sup> Sandong Guo,<sup>a</sup> and Yan Su,<sup>b,\*</sup>

<sup>a</sup>*School of Electronic Engineering, XI'AN University of Posts and Telecommunications, Xi'an 710121, China*

<sup>b</sup>*Key Laboratory of Materials Modification by Laser, Ion and Electron Beams (Dalian University of Technology),*

*Ministry of Education, Dalian 116024, China*

\*Corresponding authors. E-mail address: [chengkai\\_xiyou@163.com](mailto:chengkai_xiyou@163.com) (K. Cheng) or [su.yan@dlut.edu.cn](mailto:su.yan@dlut.edu.cn) (Y. Su)

**Table S1** Energy per layer in a unit cell of InSe, In<sub>2</sub>SeTe and In<sub>2</sub>SeS at different polymorphs.

|                      | Energy (eV)  |           |            |
|----------------------|--------------|-----------|------------|
|                      | $\epsilon$ - | $\beta$ - | $\gamma$ - |
| InSe                 | -15.31(5)    | -15.29(8) | -15.32(3)  |
| In <sub>2</sub> SeTe | -14.59(6)    | -14.57(4) | -14.60(2)  |
| In <sub>2</sub> SeS  | -15.88(2)    | -15.86(9) | -15.88(8)  |

**Table S2** Atomic and electronic structure information of BP, InSe, and Janus In<sub>2</sub>SeX (X=S or Te) with bilayer (BL) and trilayer (TL): lattice constants ( $a$ ,  $b$ ), interlayer distance along the  $z$  direction ( $d$ ), band gap ( $E_g$ ), electron affinity ( $\chi$ ), and ionization energy ( $I$ ) from PBE calculation and HSE06 calculation.

|    |                           | $a$  | $b$  | $d$  | $E_g$ (eV) |      | $\chi$ (eV) |      | $I$ (eV) |      |
|----|---------------------------|------|------|------|------------|------|-------------|------|----------|------|
|    |                           |      |      |      | (Å)        | (Å)  | (Å)         | PBE  | HSE06    | PBE  |
| BL | BP                        | 3.33 | 4.52 | 2.99 | 0.51       | 1.15 | 4.13        | 3.83 | 4.64     | 4.98 |
|    | InSe                      | 4.05 | 7.01 | 2.95 | 1.02       | 1.72 | 4.64        | 4.44 | 5.66     | 6.16 |
|    | In <sub>2</sub> SeTe(-Se) | 4.18 | 7.25 | 2.99 | 0.78       | 1.57 | 4.81        | 4.47 | 5.59     | 6.04 |
|    | In <sub>2</sub> SeTe(-Te) | 4.18 | 7.25 | 2.99 | 0.78       | 1.57 | 4.30        | 4.04 | 5.08     | 5.61 |
|    | In <sub>2</sub> SeS(-S)   | 3.96 | 6.86 | 2.93 | 1.14       | 1.95 | 4.95        | 4.65 | 6.09     | 6.60 |
|    | In <sub>2</sub> SeS(-Se)  | 3.96 | 6.86 | 2.93 | 1.14       | 1.95 | 4.57        | 4.30 | 5.71     | 6.25 |
| TL | BP                        | 3.33 | 4.51 | 2.98 | 0.31       | 0.94 | 4.15        | 4.08 | 4.46     | 5.02 |
|    | InSe                      | 4.05 | 7.01 | 2.95 | 0.79       | 1.48 | 4.74        | 4.53 | 5.53     | 6.01 |
|    | In <sub>2</sub> SeTe(-Se) | 4.18 | 7.25 | 2.99 | 0.51       | 1.08 | 4.99        | 4.90 | 5.50     | 5.98 |
|    | In <sub>2</sub> SeTe(-Te) | 4.18 | 7.25 | 2.99 | 0.51       | 1.08 | 4.33        | 4.09 | 4.84     | 5.17 |
|    | In <sub>2</sub> SeS(-S)   | 3.96 | 6.86 | 2.93 | 0.89       | 1.67 | 5.11        | 4.85 | 6.00     | 6.52 |
|    | In <sub>2</sub> SeS(-Se)  | 3.96 | 6.86 | 2.93 | 0.89       | 1.67 | 4.58        | 4.29 | 5.47     | 5.96 |

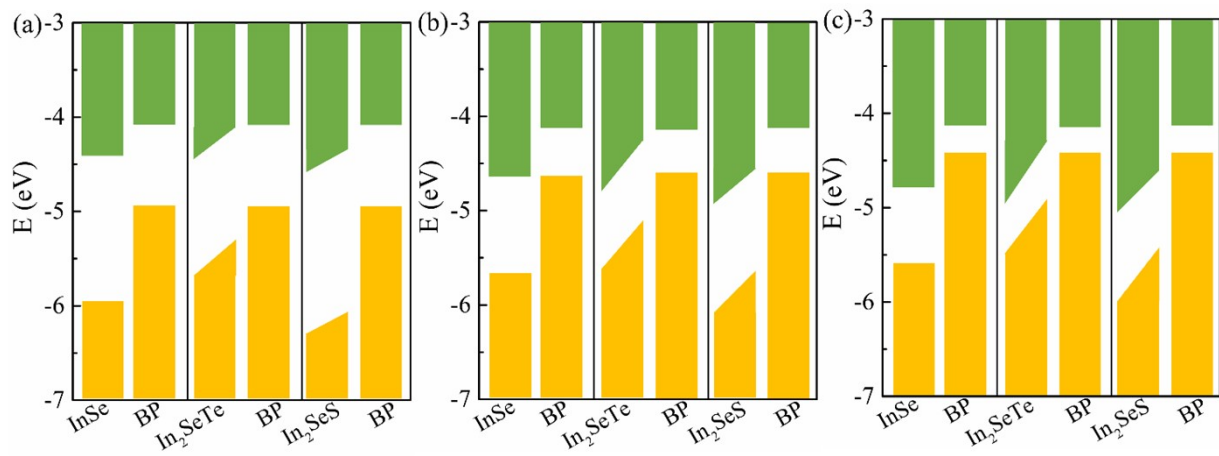

**Fig. S1** Band alignments between BP and InSe, BP and In<sub>2</sub>SeTe, as well as BP and In<sub>2</sub>SeS of (a) monolayer, (b) bilayer, and (c) trilayer calculated with PBE functional.
